# Supplementary material for: Cost Effectiveness of Pharmacogenetic Testing for Drugs with Clinical Pharmacogenetics Implementation Consortium (CPIC) Guidelines: A Systematic Review
Source: PubMed Central journal article supplement — Clin Pharmacol Ther. 2022 Oct 9;112(6):1318–28. doi: 10.1002/cpt.2754 (PMC9828439; doi:10.1002/cpt.2754), 2022-10-09

Supplemental Figure S1: Cost outcomes stratified by study characteristics A) Cost outcome by publication year B) Cost outcome by drug or drug Class C) Cost outcome by funding source D) Cost outcome by continent E) Cost outcome by cohort type F) Cost outcome by perspective G) Cost outcome by QHES

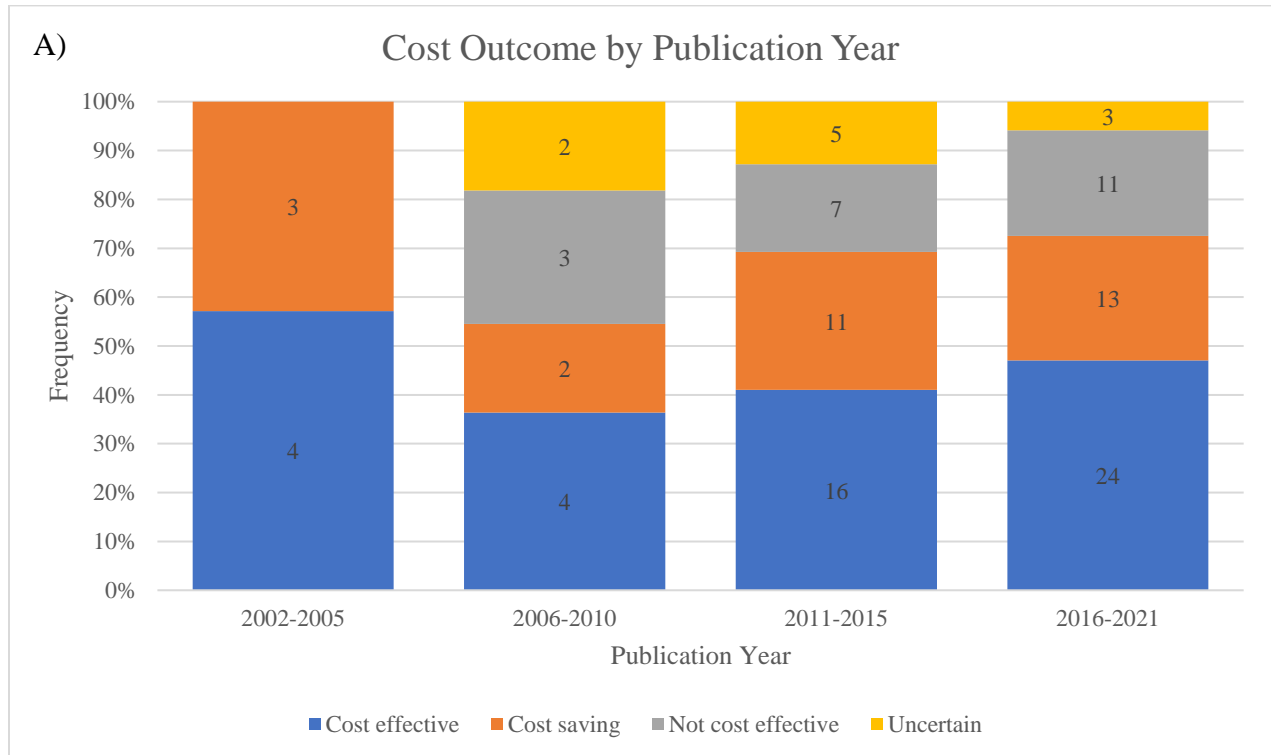

B)

### Cost Outcome by Drug or Drug Class

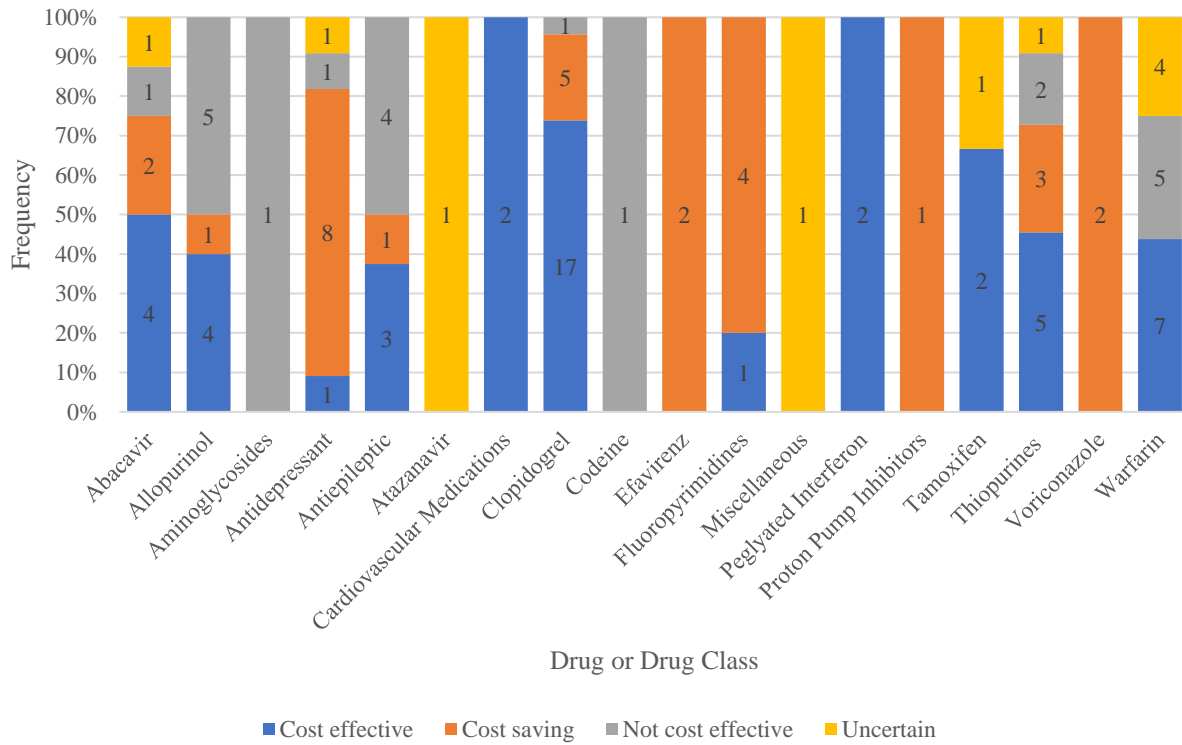

C)

### Cost Outcome by Funding Source

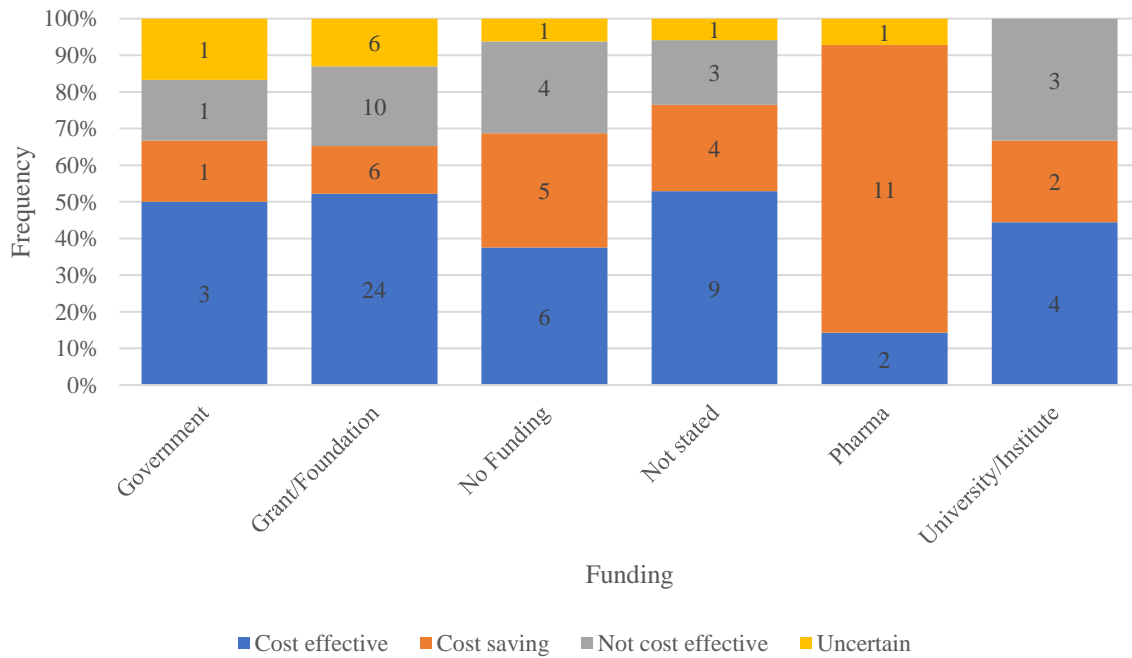

D)

Cost Outcome by Continent

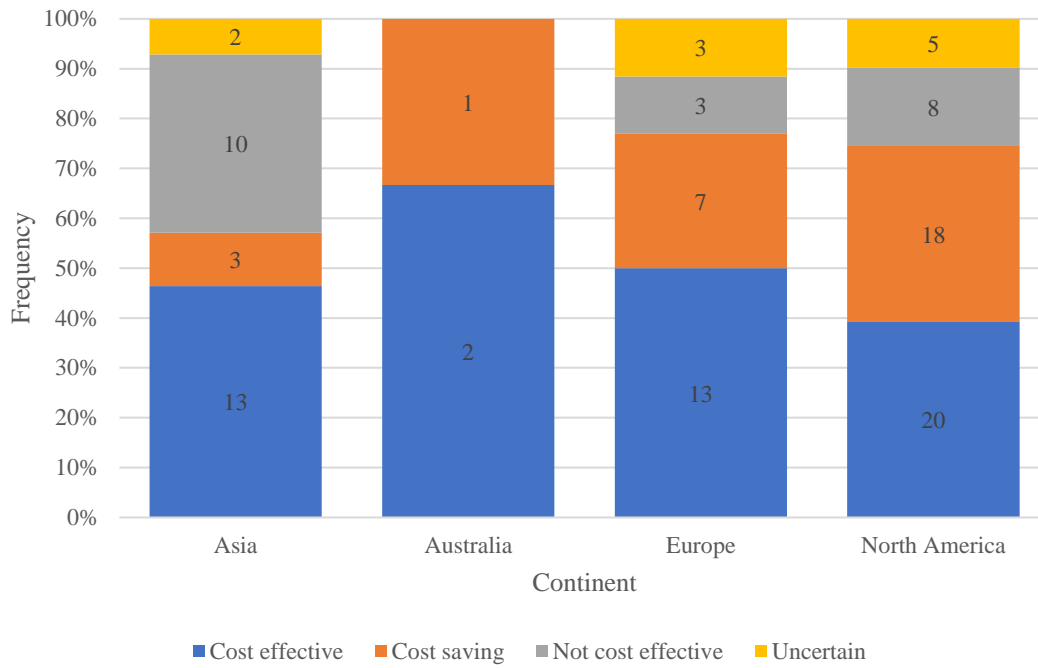

E)

Cost Outcome by Cohort Type

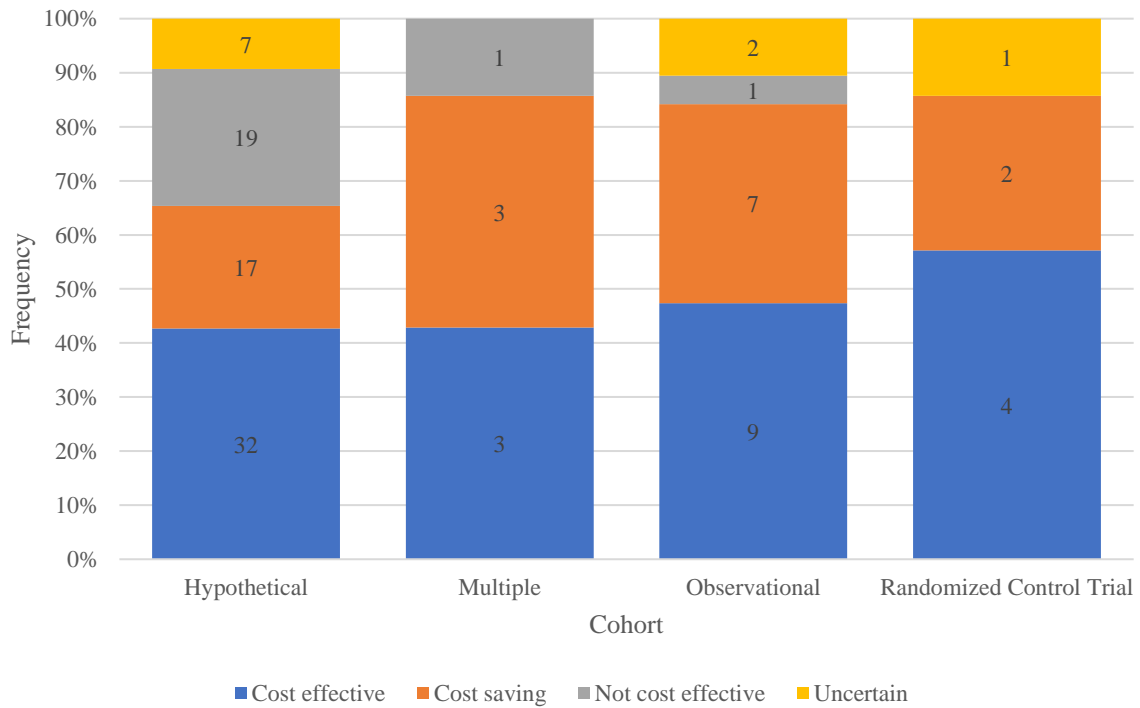

F)

Cost Outcome by Perspective

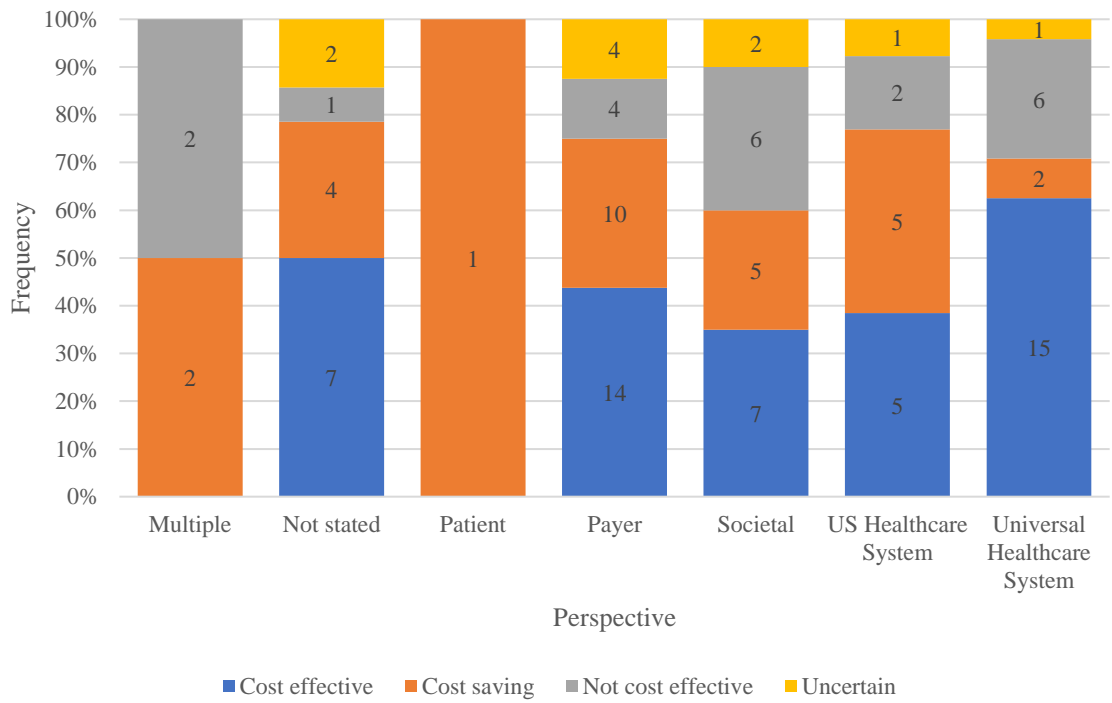

G)

Cost Outcome by QHES Score

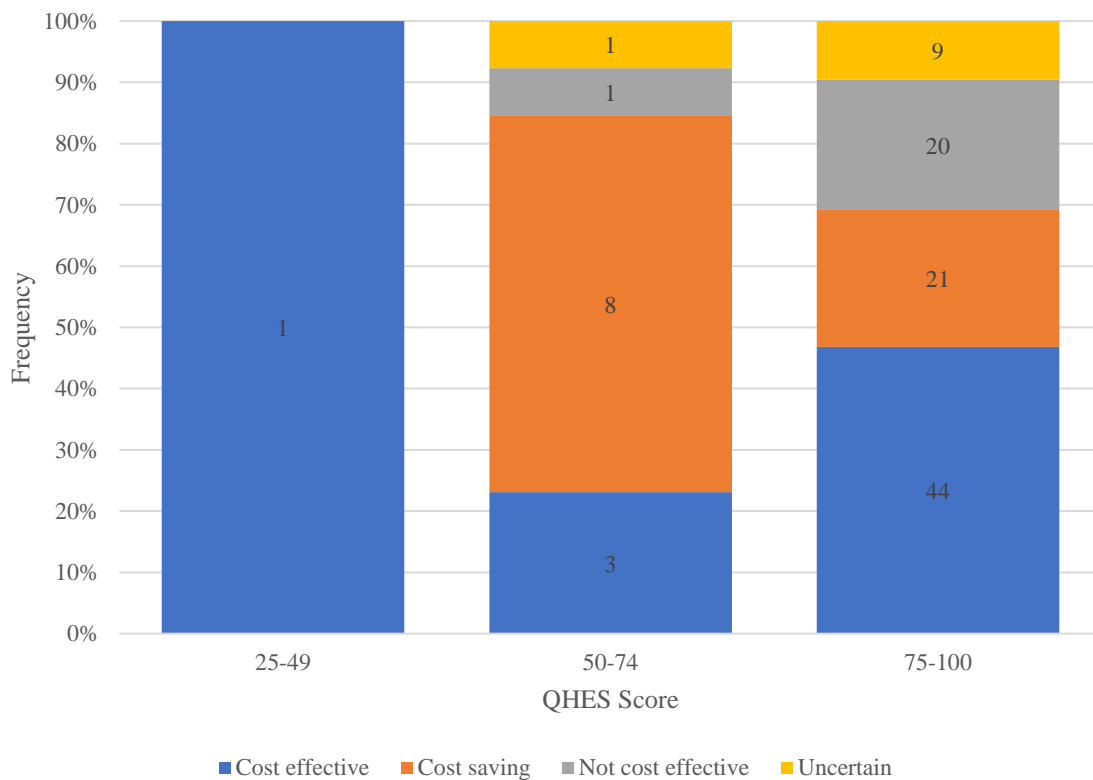

Supplement: CPT-112-1318-s001.pdf [file CPT-112-1318-s001.pdf]
